# Supplementary material for: Hydrogels allow the precise growth tracking of plasmonic gold nanoparticles for mercury analysis
Source: Royal Society of Chemistry journal article supplement (doi:10.1039/d2tc02483g), 2022-01-01
Supplement: d2tc02483g1.pdf [file d2tc02483g1.pdf]

*Electronic Supplementary Information*

**Hydrogels Endow the Precise Growth Tracks of Plasmonic Gold Nanoparticles for Mercury Analysis**

Hang Zhang, Jun Jiang Luo, Zhe Sun, Hao Lin Zou, Hong Qun Luo, Nian Bing Li,\*  
Bang Lin Li\*

Key Laboratory of Luminescence Analysis and Molecular Sensing (Southwest University), Ministry of Education, School of Chemistry and Chemical Engineering, Southwest University, Chongqing 400715, P. R. China.

Email: [chemlibl@swu.edu.cn](mailto:chemlibl@swu.edu.cn) (B. L. Li); [linb@swu.edu.cn](mailto:linb@swu.edu.cn) (N. B. Li)

**This PDF file includes seven figures, two tables, and nine pages:**

Figure S1

Figure S2

Figure S3

Figure S4

Figure S5

Figure S6

Figure S7

Table S1

Table S2

Supporting References

**Figure S1.**

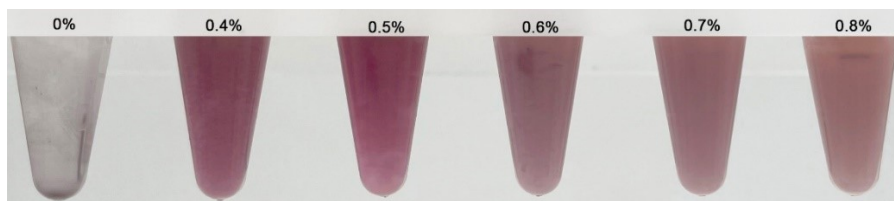

**Fig. S1.** The pictures showing the different nano-staining reactions of  $\text{HAuCl}_4$  and cysteine in various concentrations of agarose. The concentrations of cysteine,  $\text{HAuCl}_4$  and  $\text{Hg}^{2+}$  ions were 0.2 mM, 1.0 mM and 100 nM, respectively.

**Figure S2.**

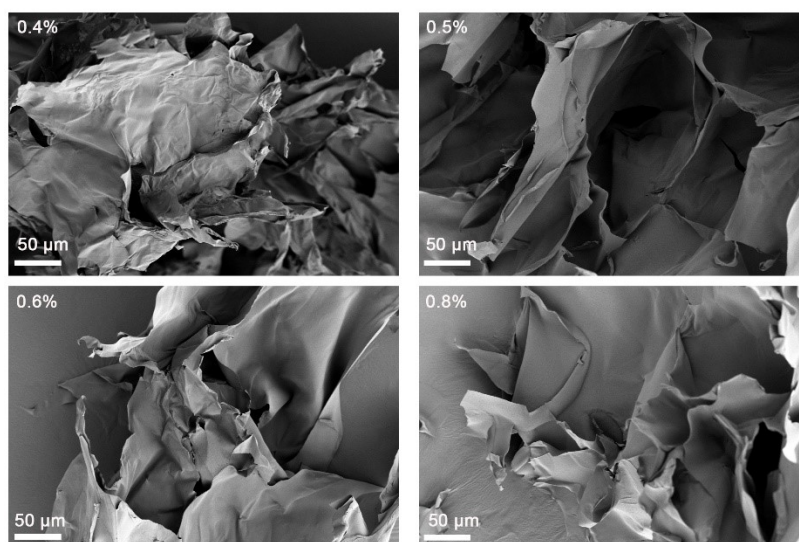

**Fig. S2.** Scanning electronic microscope (SEM) pictures showing the diversity of pore sizes in hydrogels which are prepared from different concentrations of agarose (0.4%, 0.5%, 0.6%, 0.8%).

**Figure S3.**

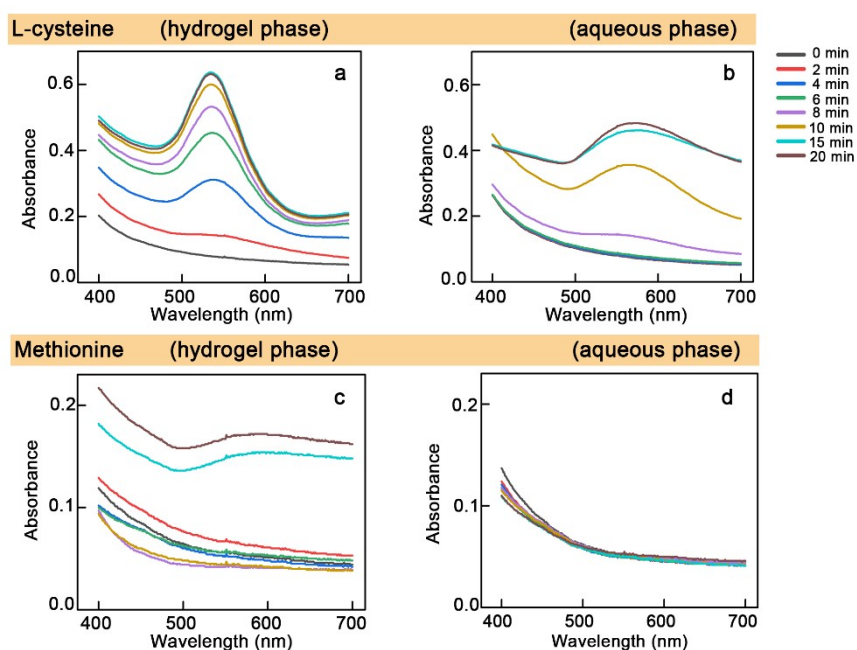

**Fig. S3.** Time-resolved absorption spectra for recording the formation process of gold NPs with different reduction reagents of L-cysteine (a, b) and methionine (c, d) in agarose hydrogel (a, c) and aqueous (b, d) phases. The concentrations of L-cysteine and methionine are 0.5 mM.

**Figure S4.**

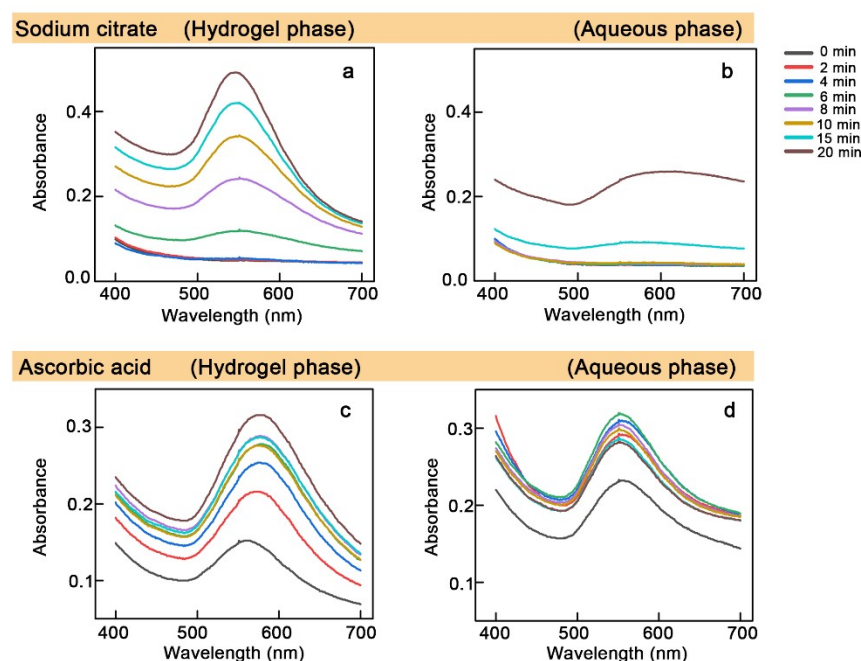

**Fig. S4.** Time-resolved absorption spectra for recording the formation process of gold NPs with different reduction reagents of sodium citrate (a, b) and ascorbic acid (c, d) in agarose hydrogel (a, c) and aqueous (b, d) phases. The concentrations of sodium citrate and ascorbic acid are 0.5 mM.

**Figure S5.**

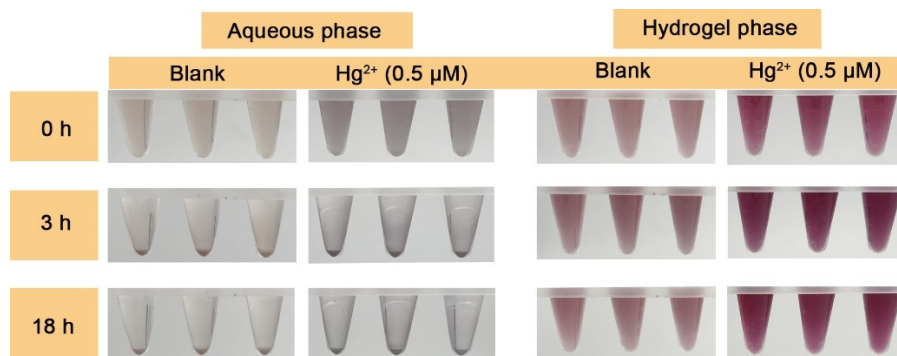

**Fig. S5.** Real pictures displayed the different growth processes of gold NPs in two reaction phases, which were incubated in the absence and presence of Hg<sup>2+</sup> ions for diverse standing times (0, 3, and 18 h)

**Figure S6.**

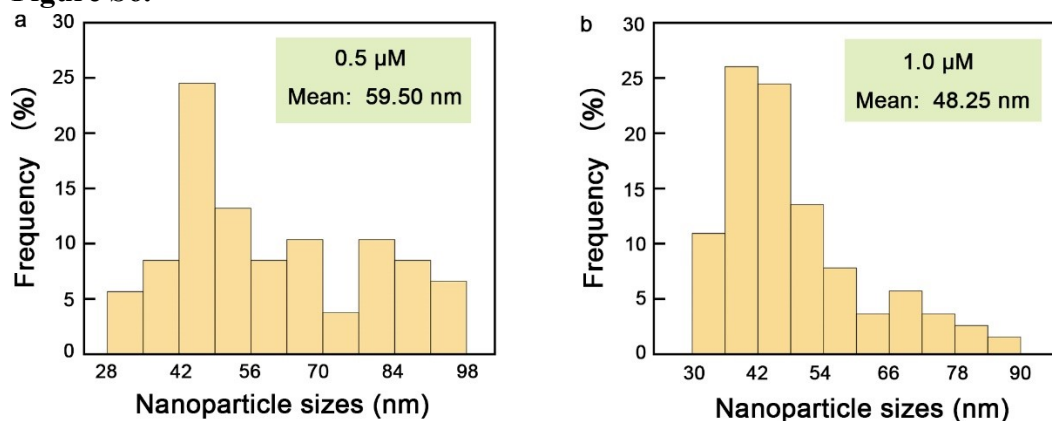

**Fig. S6.** The size distribution of gold NPs in the nano-staining hydrogels, which are generated from 0.5 μM (a) and 1.0 μM (b) Hg<sup>2+</sup> ions, respectively.

**Figure S7.**

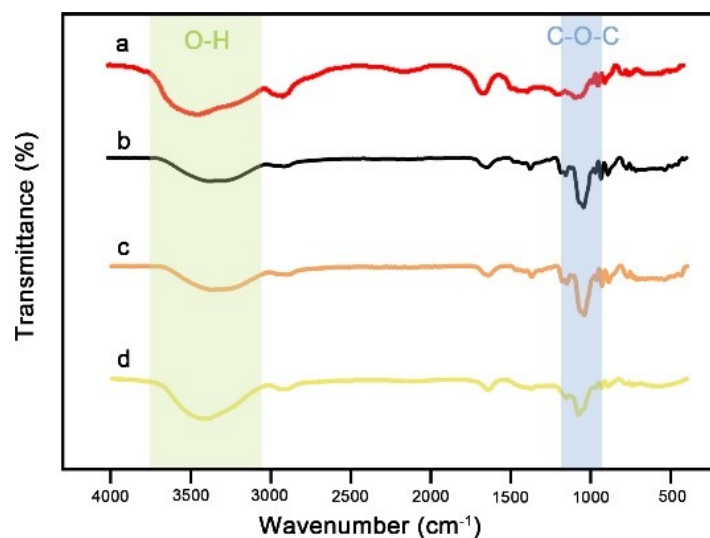

**Fig. S7.** Fourier transform infrared (FTIR) spectra of diverse forms of agarose. (a) the agarose powders. (b) the agarose aerogel. (c) the cysteine doped agarose aerogel. (d) the agarose aerogel after the treatments of nano-staining sensing strategies. The reaction had no effects to the chemical composition of agarose.

**Table S1.** Measurements of Hg<sup>2+</sup> ions in real samples using the nano-staining hydrogel assay.

| Sample <sup>a</sup> | Original concentration (nM) | Added concentration (nM) <sup>b</sup> | Hg <sup>2+</sup> Nano-staining hydrogel assay (nM) <sup>c</sup> | Recovery (%) | RSD  |
|---------------------|-----------------------------|---------------------------------------|-----------------------------------------------------------------|--------------|------|
| Tap water           | 0.00                        | 200.00                                | 194.32                                                          | 97.16        | 6.48 |
|                     | 0.00                        | 400.00                                | 465.60                                                          | 116.40       | 4.10 |
|                     | 0.00                        | 600.00                                | 555.60                                                          | 92.60        | 5.59 |

<sup>a</sup> Measured five times. <sup>b</sup> Added amount of Hg<sup>2+</sup> ions in the environmental samples. <sup>c</sup> Measured results based on our developed method.

**Table S2.** The list indicating the comparison of colorimetric Hg<sup>2+</sup> analysis routes developed by the plasmonic gold nano-probes.

| Response mechanism                     | Recognition mechanism                                                                                     | Sensing phase     | LOD     | Other sensing performance (Stability <i>et al.</i> )         | Ref.                              |
|----------------------------------------|-----------------------------------------------------------------------------------------------------------|-------------------|---------|--------------------------------------------------------------|-----------------------------------|
| LSPR of as-prepared AuNP probes        | Lysine can strongly interact with Hg <sup>2+</sup> ions                                                   | Aqueous solutions | 2.9 nM  | Weak, influenced by the dispersion of nano-probes            | Sener <i>et al.</i> <sup>S1</sup> |
| LSPR of DNA-functionalized AuNP probes | Thymine-Hg <sup>2+</sup> -thymine coordination chemistry                                                  | Aqueous solutions | 3.0 μM  | Weak, influenced by DNA modification and dispersion of AuNPs | Xue <i>et al.</i> <sup>S2</sup>   |
| LSPR changes of Au nanobipyramids      | The addition of Hg <sup>2+</sup> induces the formation of a partition layer on Au nanobipyramid surfaces. | Aqueous solutions | 200 nM  | Weak, influenced by the dispersion of nano-probes            | Qi <i>et al.</i> <sup>S3</sup>    |
| SPR of Ag/Au nanoparticles             | Hg <sup>2+</sup> -induced specific dissolution of Ag                                                      | Aqueous solutions | 5 nM    | Pb <sup>2+</sup> ions might interfere the analysis results   | Xing <i>et al.</i> <sup>S4</sup>  |
| Catalysis of gold amalgam              | The electron transfer from mercury to the adsorbed 4-nitrophenol                                          | Aqueous solutions | 1.45 nM | The background noise signal was high                         | Chen <i>et al.</i> <sup>S5</sup>  |

---

|                                                               |                                                                |                           |         |                                                                                         |                                      |
|---------------------------------------------------------------|----------------------------------------------------------------|---------------------------|---------|-----------------------------------------------------------------------------------------|--------------------------------------|
| LSPR of as-prepared AuNP probes                               | Thymine-Hg <sup>2+</sup> -thymine coordination chemistry       | Cellulose paper substrate | 50 nM   | Weak, influenced by the dispersion of nano-probes                                       | and Chen <i>et al.</i> <sup>S6</sup> |
| Catalytic activity of gold to the reduction of methylene blue | Hg <sup>2+</sup> -triggered formation of amalgam               | Porous gold wood          | 32 pM   | The background noise signal was high                                                    | Hai <i>et al.</i> <sup>S7</sup>      |
| LSPR of <i>in-situ</i> formed AuNPs                           | High-affinity metallophilic interaction between Hg and Au ions | Agarose hydrogels         | 3.7 nM  | Medium stability which was influenced by the H <sub>2</sub> AuCl <sub>4</sub> diffusion | Du <i>et al.</i> <sup>S8</sup>       |
| LSPR of <i>in-situ</i> formed gold NPs                        | High-affinity metallophilic interaction between Hg and Au ions | Agarose hydrogels         | 1.25 nM | High stability independent by reaction times                                            | This work                            |

---



### Supporting References.

- [S ] G. Sener, L. Uzun and A. Denizli, *Anal. Chem.*, 2014, **86**, 514-520.
- [S2] X. Xue, F. Wang and X. Liu, *J. Am. Chem. Soc.*, 2008, **130**, 3244-3245.
- [S3] Y. Qi, J. Zhao, G. J. Weng, J. J. Li, X. Li, J. Zhu and J. W. Zhao, *J. Mater. Chem. C*, 2018, **6**, 12283.
- [S4] T. Y. Xing, J. Zhao, G. J. Weng, J. J. Li, J. Zhu and J. W. Zhao, *J. Mater. Chem. C*, 2018, **6**, 7557.
- [S5] Z. Chen, C. Zhang, Q. Gao, G. Wang, L. Tan and Q. Liao, *Anal. Chem.*, 2015, **87**, 10963-10968.
- [S6] G. H. Chen, W. Y. Chen, Y. C. Yen, C. W. Wang, H. T. Chang and C. F. Chen, *Anal. Chem.*, 2014, **86**, 6843-6849.
- [S7] J. Hai, F. Chen, J. Su, F. Xu and B. Wang, *Anal. Chem.*, 2018, **90**, 4909-4915.
- [S8] X. J. Du, Y. Chen, L. Y. Qin, H. Q. Luo, N. B. Li and B. L. Li, *Environ. Sci. Technol.*, 2022, **56**, 1041-1052.
